# Supplementary material
Source: Springer Nature journal article supplement (https://www.springermedizin.de/resource/supplementary/12916_2013_1081_MOESM17_ESM.pdf/9598848)

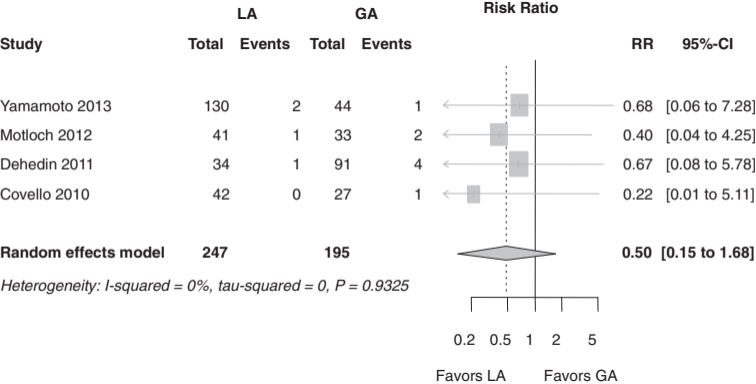

Supplement: MOESM17 [file 9598848]
